# Supplementary material
Source: publisher site journal article supplement (https://www.dovepress.com/article/612207)
Supplement: Supplementary file 1 [file Revised%20Supplementary%20materials-clean%20version.docx]

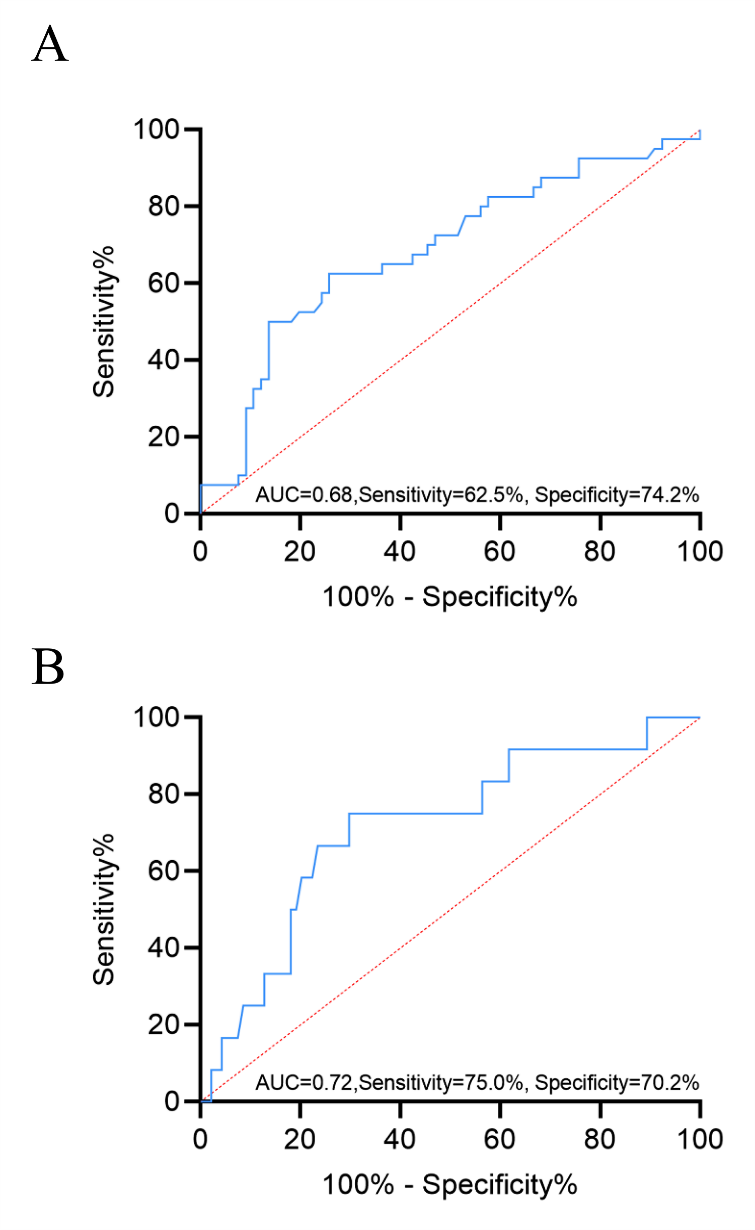


Figure S1. Receiver operator curve (ROC) analysis of the discrimination potential of flumatinib concentration and gastrointestinal adverse events. (A) Diarrhea. (B) nausea and vomiting.

Table S1. Multivariable adjustment for the potential confounding factors.

|  | MMR |  | DMR |  |
| --- | --- | --- | --- | --- |
| Variables | OR (95%CI) | P. value | OR (95%CI) | P. value |
| Age at diagnosis | 1.002 (0.946-1.061) | 0.944 | 1.014 (0.971-1.059) | 0.530 |
| Sex | 0.904 (0.241-3.392) | 0.998 | 0.789 (0.210-2.963) | 0.725 |
| Therapy duration | 0.668 (0.315-1.419) | 0.294 | 0.570 (0.348-0.934) | 0.026 |
| Cmax_2h | 0.971 (0.947-0.996) | 0.022 | 0.981 (0.967-0.995) | 0.010 |

Abbreviations: MMR, major molecular response; DMR, deep molecular response; OR, odds ratio; CI, confidence interval; Cmax_2h, 2-hour post-dose concentration

Table S2. Clinical characteristics of patients with flumatinib later-line treatment.

|  | Second-line (N=26) | Third-line or above (N=16) |
| --- | --- | --- |
| Sex (male), n (%) | 16 (61.5) | 8 (50.0) |
| Age at diagnosis (years), median (IQR) | 43.0 (31.0-57.0) | 34.0 (24.0-41.0) |
| Time from first TKI to flumatinib in months, median (IQR) | 16.6 (8.2-32.5) | 50.6 (27.9-77.2) |
| Flumatinib therapy duration (months), median (IQR) | 46.4 (23.1-54.2) | 48.5 (34.1-58.0) |
| Response at baseline, n (%) |  |  |
| CHR | 9 (34.6) | 3 (18.75) |
| MR1 | 4 (15.4) | 2 (12.5) |
| MR2 | 8 (30.8) | 8 (50.0) |
| MMR or better | 5 (19.2) | 3 (18.75) |
| Therapeutic effect of flumatinib, n (%) |  |  |
| CHR | 4 (15.4) | 2 (12.5) |
| CCyR | 6 (23.1) | 7 (43.75) |
| MMR | 9 (34.6) | 3 (18.75) |
| MR4 Or better | 7 (26.9) | 4 (25.0) |
| Dosage, n (%) |  |  |
| 600 mg daily | 17 (65.4) | 12 (75.0) |
| 400 mg daily | 8 (30.8)a | 4 (25.0) |

a Eight patients received a low-dose regimen of 400mg daily, and three patients further reduced their dosage to 200mg daily.

Abbreviations: TKI, tyrosine kinase inhibitor; IQR, interquartile range; CHR, complete hematological response; MR, molecular response; CCyR, complete cytological response; MMR, major molecular response; DMR, deep molecular response.

Table S3. The correlation between adverse events and flumatinib concentrations.

| Adverse events | Yes | | No | |  |
| --- | --- | --- | --- | --- | --- |
|  | N (%) | Cmax_2h | N (%) | Cmax_2h | P.value |
| Neutropenia | 14 (12.7) | 102.03±42.36 | 96 (87.3) | 115.03±68.31 | 0.747 |
| Anemia | 13 (11.8) | 104.67±83.85 | 97 (88.2) | 114.41±63.22 | 0.295 |
| Thrombocytopenia | 20 (18.2) | 97.81±79.69 | 90 (81.8) | 116.48±62.23 | 0.062 |
| Diarrhea | 40 (36.4) | 136.28±75.09 | 70 (63.6) | 99.39±54.94 | 0.006 |
| Nausea and vomiting | 12 (10.9) | 151.05±68.81 | 98 (89.1) | 108.49±63.81 | 0.016 |
| Musculoskeletal pain | 15 (13.6) | 147.63±81.50 | 95 (86.4) | 107.65±61.14 | 0.063 |
| Rash | 13 (11.8) | 130.36±62.15 | 97 (88.2) | 110.93±65.89 | 0.178 |
| Fatigue | 16 (14.5) | 142.9±63.73 | 94 (85.5) | 120.05±64.70 | 0.170 |
| Hepatobiliary dysfunction | 17 (15.5) | 117.35±70.88 | 93 (84.5) | 112.54±64.78 | 0.867 |
| Elevated creatinine | 11 (10.0) | 136.30±95.96 | 99 (90.0) | 110.65±30.09 | 0.456 |
| Hyperuricemia | 22 (20.0) | 102.38±58.63 | 88 (80.0) | 116.01±61.15 | 0.447 |

Abbreviations: Cmax_2h, 2-hour post-dose concentration.

Table S4. The correlation between flumatinib concentrations and patient age.

| Age (years) | Cmin (ng/mL) | P. value | Cmax_2h(ng/mL) | P. value |
| --- | --- | --- | --- | --- |
| <35 (N=29) | 30.96±16.90 | 0.008 | 90.81±43.67 | 0.087 |
| 35-56 (N=52) | 46.07±20.81 | 108.59±51.44 |
| >56 (N=29) | 56.18±43.74 | 143.84±62.10 |

Abbreviations: Cmin, trough concentration; Cmax_2h, 2-hour post-dose concentration.

Table S5. Low-dose flumatinib therapy.

|  | n=36 | |
| --- | --- | --- |
| Reduction reasons |  | |
| Adverse events | 16 (44.4) | |
| Preparation for discontinuation | 14 (38.9) | |
| Economic factors | 6 (16.7) | |
|  | Flumatinib concentration, ng/mL, mean±SD | |
|  | Cmax_2h | Cmin |
| Statusa |  |  |
| Maintained MMR | 77.03±34.35* | 29.37±18.57 |
| Lossing MMR | 25.80±15.27 | 9.04±5.74 |
| Maintained DMR | 79.94±33.63** | 30.30±18.89 |
| Lossing DMR | 31.05±12.54 | 12.70±5.37 |

a Two patients lost the MMR, and four patients lost the DMR.

*，p<0.05; **, p<0.01

Abbreviations: SD, standard deviation; MMR, major molecular response; DMR, deep molecular response; Cmin, trough concentration; Cmax_2h, 2-hour post-dose concentration
